# Supplementary material for: Detection of transcriptome-wide microRNA–target interactions in single cells with agoTRIBE
Source: PubMed Central journal article supplement (PMC11324520; doi:10.1038/s41587-023-01951-0), 2023-09-21
Supplement: 41587_2023_1951_MOESM2_ESM.pdf [file 41587_2023_1951_MOESM2_ESM.pdf]

## Reporting Summary

Nature Portfolio wishes to improve the reproducibility of the work that we publish. This form provides structure for consistency and transparency in reporting. For further information on Nature Portfolio policies, see our [Editorial Policies](#) and the [Editorial Policy Checklist](#).

### Statistics

For all statistical analyses, confirm that the following items are present in the figure legend, table legend, main text, or Methods section.

n/a | Confirmed

- The exact sample size ( $n$ ) for each experimental group/condition, given as a discrete number and unit of measurement
- A statement on whether measurements were taken from distinct samples or whether the same sample was measured repeatedly
- The statistical test(s) used AND whether they are one- or two-sided  
*Only common tests should be described solely by name; describe more complex techniques in the Methods section.*
- A description of all covariates tested
- A description of any assumptions or corrections, such as tests of normality and adjustment for multiple comparisons
- A full description of the statistical parameters including central tendency (e.g. means) or other basic estimates (e.g. regression coefficient) AND variation (e.g. standard deviation) or associated estimates of uncertainty (e.g. confidence intervals)
- For null hypothesis testing, the test statistic (e.g.  $F$ ,  $t$ ,  $r$ ) with confidence intervals, effect sizes, degrees of freedom and  $P$  value noted  
*Give  $P$  values as exact values whenever suitable.*
- For Bayesian analysis, information on the choice of priors and Markov chain Monte Carlo settings
- For hierarchical and complex designs, identification of the appropriate level for tests and full reporting of outcomes
- Estimates of effect sizes (e.g. Cohen's  $d$ , Pearson's  $r$ ), indicating how they were calculated

*Our web collection on [statistics for biologists](#) contains articles on many of the points above.*

### Software and code

Policy information about [availability of computer code](#)

Data collection | No software was used for data collection.

Data analysis | cutadapt v. 4.0  
STAR v. 2.7.2b  
Sambamba tool v.0.7.1  
featureCounts v2.0.0  
bowtie2 v 2.3.5.153  
Seurat v4.0  
AlphaFold2 DB v1  
Monocle v2.28.0  
Various R packages as described in the methods section  
Exact command lines used are available at: <https://github.com/vaishnoviS/agoTRIBE>

For manuscripts utilizing custom algorithms or software that are central to the research but not yet described in published literature, software must be made available to editors and reviewers. We strongly encourage code deposition in a community repository (e.g. GitHub). See the Nature Portfolio [guidelines for submitting code & software](#) for further information.

## Data

Policy information about [availability of data](#)

All manuscripts must include a [data availability statement](#). This statement should provide the following information, where applicable:

- Accession codes, unique identifiers, or web links for publicly available datasets
- A description of any restrictions on data availability
- For clinical datasets or third party data, please ensure that the statement adheres to our [policy](#)

### Data availability

Sequencing data have been deposited at SRA under this accession number: PRJNA994505

### Code availability

The source used in this study is available at GitHub: <https://github.com/vaishnoviS/agoTRIBE>

### Public data and databases utilized in the study:

NCBI dbSNP v.151

REDportal database

hg38 reference genome from NCBI

hg38 reference annotation from Ensembl database (<https://www.ensembl.org/info/data/ftp/index.html>, release version 99)

HITS-CLIP (Ago2 CLIP-Seq) and PAR-CLIP (AGO1234 PAR-CLIP) targets downloaded as BED format from Dorina database

eCLIP data (GSE140367, GSM4247216, Empty vector control rep 1 [AGO-eCLIP-seq]) was downloaded from NCBI GEO database

Predicted miRNA target information was retrieved from TargetScan Human database.

All of the intermediate data files with gene expression values, editing events etc are available as Supplementary Tables.

## Human research participants

Policy information about [studies involving human research participants and Sex and Gender in Research](#).

Reporting on sex and gender

Population characteristics

Recruitment

Ethics oversight

Note that full information on the approval of the study protocol must also be provided in the manuscript.

## Field-specific reporting

Please select the one below that is the best fit for your research. If you are not sure, read the appropriate sections before making your selection.

Life sciences  Behavioural & social sciences  Ecological, evolutionary & environmental sciences

For a reference copy of the document with all sections, see [nature.com/documents/nr-reporting-summary-flat.pdf](https://www.nature.com/documents/nr-reporting-summary-flat.pdf)

## Life sciences study design

All studies must disclose on these points even when the disclosure is negative.

Sample size

Data exclusions

Replication

Randomization

Blinding

# Reporting for specific materials, systems and methods

We require information from authors about some types of materials, experimental systems and methods used in many studies. Here, indicate whether each material, system or method listed is relevant to your study. If you are not sure if a list item applies to your research, read the appropriate section before selecting a response.

## Materials & experimental systems

| n/a                                 | Involved in the study                                     |
|-------------------------------------|-----------------------------------------------------------|
| <input type="checkbox"/>            | <input checked="" type="checkbox"/> Antibodies            |
| <input type="checkbox"/>            | <input checked="" type="checkbox"/> Eukaryotic cell lines |
| <input checked="" type="checkbox"/> | <input type="checkbox"/> Palaeontology and archaeology    |
| <input checked="" type="checkbox"/> | <input type="checkbox"/> Animals and other organisms      |
| <input checked="" type="checkbox"/> | <input type="checkbox"/> Clinical data                    |
| <input checked="" type="checkbox"/> | <input type="checkbox"/> Dual use research of concern     |

## Methods

| n/a                                 | Involved in the study                           |
|-------------------------------------|-------------------------------------------------|
| <input checked="" type="checkbox"/> | <input type="checkbox"/> ChIP-seq               |
| <input checked="" type="checkbox"/> | <input type="checkbox"/> Flow cytometry         |
| <input checked="" type="checkbox"/> | <input type="checkbox"/> MRI-based neuroimaging |

## Antibodies

Antibodies used

Rabbit polyclonal human ADAR2 (GeneTex, GTX54916), lot number 822003857 and 822102256.  
 Mouse monoclonal Ago2 (Abcam, ab57113), clone 2E12-1C9, lot number gr3186789-1.  
 Mouse monoclonal anti-Flag (Sigma, F3165), clone M2, lot number SLBL1237V.  
 Mouse monoclonal anti- $\alpha$ -Tubulin (Sigma, T5168), clone B-5-1-2, lot number 115M4828V.

Validation

GTX54916 validation by manufacturer <https://www.genetex.com/Product/Detail/ADAR2-antibody/GTX54916> and in our study, Sekar et al, Supplementary Figure 1b-d and Figure 1c.  
 ab57113 validation by manufacturer <https://www.abcam.com/products/primary-antibodies/argonaute-2-antibody-2e12-1c9-bsa-and-azide-free-ab57113.html>  
 ab57113 has been referenced in 150 publications <https://www.abcam.com/products/primary-antibodies/argonaute-2-antibody-2e12-1c9-bsa-and-azide-free-ab57113.html>  
 F3165 validation by manufacturer <http://www.sigmaaldrich.com/catalog/product/sigma/f3165?lang=en&region=SE>, references are available from <https://www.sigmaaldrich.com/SE/en/product/sigma/f3165>.  
 T5168 enhanced validation by manufacturer <https://www.sigmaaldrich.com/SE/en/product/sigma/t5168>, references are available from <https://www.sigmaaldrich.com/SE/en/product/sigma/t5168>

## Eukaryotic cell lines

Policy information about [cell lines and Sex and Gender in Research](#)

Cell line source(s)

Standard HEK-293T cells were used, obtained from the D. Kanellis/J. Bartek lab. Standard K562 (ATCC® CCL-243TM) were used, obtained from G. Baselli (Vicent Pelechano lab)

Authentication

HEK-293T cell line was authenticated using cell line authentication test by Eurofins Genomics. The K562 cell line was not authenticated.

Mycoplasma contamination

Both HEK-293T and K562 cells were specifically tested for Mycoplasma contamination.

Commonly misidentified lines  
(See [ICLAC](#) register)

We have not worked with any commonly misidentified cell lines.
